# Supplementary material for: Differential association of CD68+ and CD163+ macrophages with macrophage enzymes, whole tumour gene expression and overall survival in advanced melanoma
Source: PubMed Central journal article supplement (PMC7653046; doi:10.1038/s41416-020-01037-7), 2020-08-26
Supplement: 41416_2020_1037_MOESM1_ESM.pdf [file 41416_2020_1037_MOESM1_ESM.pdf]

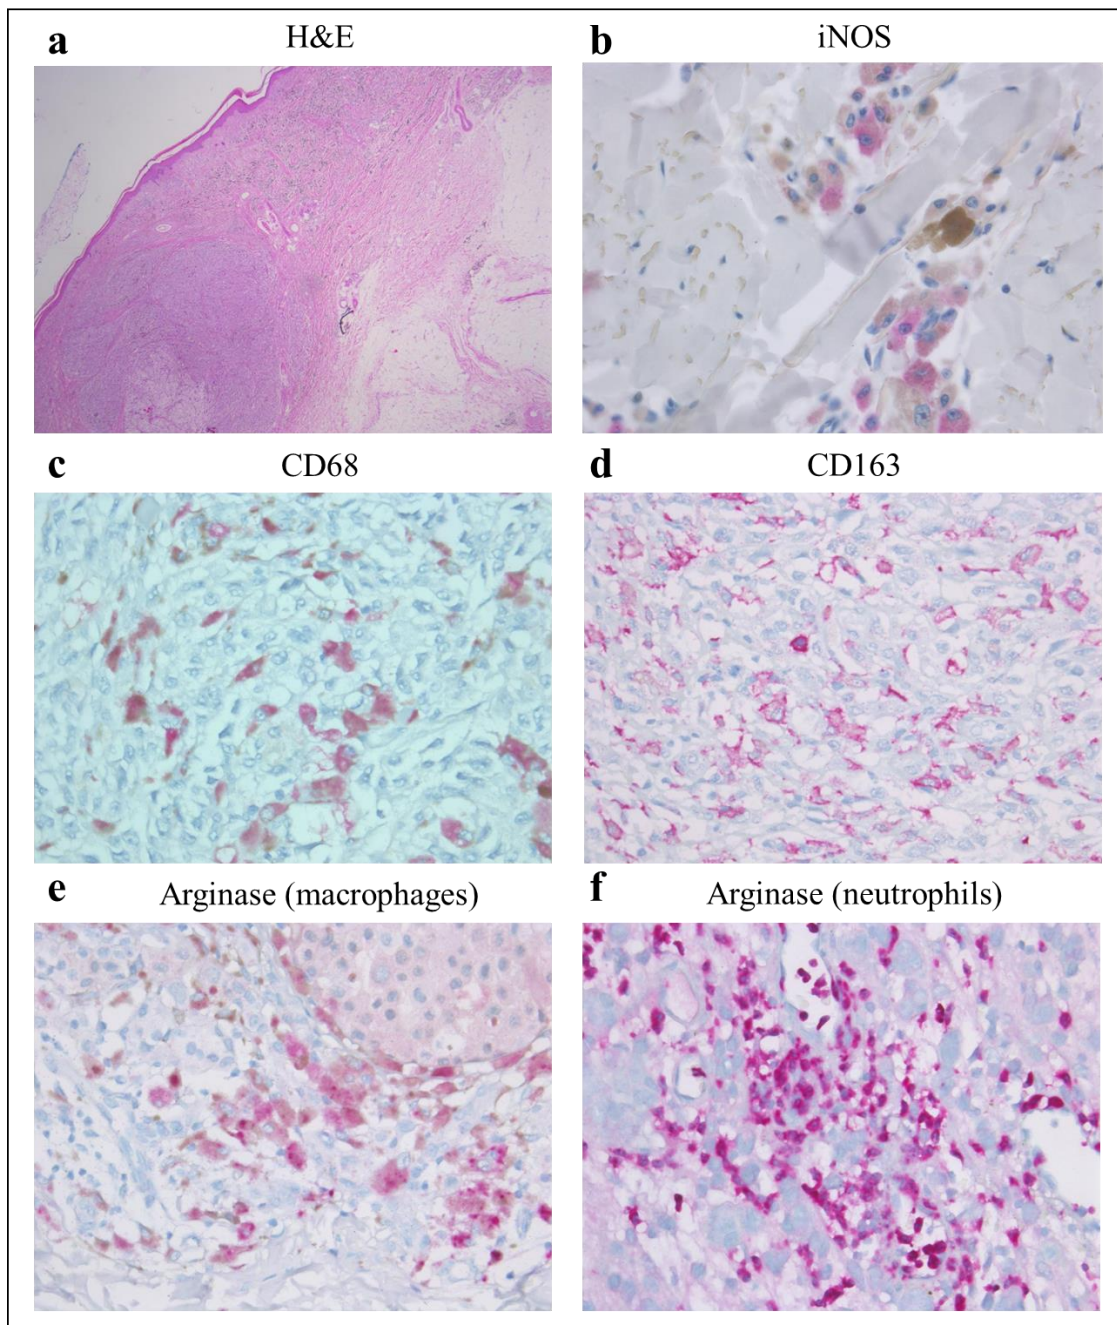

**Figure 1 Staining of primary melanoma tumours**

FFPE tumours were cut and stained by H&E (a), along with immunohistochemical staining of iNOS (b), CD68 (c), CD163 (d) and arginase (e-f). Immunohistochemical staining was performed using an alkaline phosphatase coupled to Fast-Red to produce a red/pink reaction. Images are shown at 40x (a), 400x (b) or 100x (c-f) magnification.

**Table 1 Pathological features of the tumours stained by immunohistochemistry**

| <b>Patient Characteristics</b>  |                       |             |          |
|---------------------------------|-----------------------|-------------|----------|
| <b>Characteristic</b>           |                       | <b>No.</b>  | <b>%</b> |
| Sex                             | Male                  | 35          | (61)     |
|                                 | Female                | 22          | (39)     |
| Age                             | Median                | 64 years    |          |
|                                 | Range                 | 18-85 years |          |
| Subtype                         | Superficial spreading | 20          | (34)     |
|                                 | Nodular               | 19          | (32)     |
|                                 | Acral lentiginous     | 7           | (12)     |
|                                 | Lentigo maligna       | 6           | (10)     |
|                                 | Desmoplastic          | 1           | (2)      |
|                                 | Unknown               | 5           | (8)      |
| Primary location                | Acral                 | 11          | (19)     |
|                                 | Head and neck         | 10          | (18)     |
|                                 | Lower limb            | 15          | (26)     |
|                                 | Upper limb            | 12          | (21)     |
|                                 | Trunk                 | 9           | (26)     |
| Breslow depth                   | <1mm                  | 5           | (8)      |
|                                 | 1.01-2mm              | 7           | (12)     |
|                                 | 2.01-4mm              | 13          | (22)     |
|                                 | >4.01mm               | 32          | (54)     |
| Stage                           | pT1a                  | 2           | (4)      |
|                                 | pT1b                  | 3           | (5)      |
|                                 | pT2a                  | 7           | (12)     |
|                                 | pT3a                  | 8           | (14)     |
|                                 | pT3b                  | 4           | (7)      |
|                                 | pT4a                  | 5           | (9)      |
|                                 | pT4b                  | 28          | (49)     |
|                                 | Mitotic count         | Median      | 6.5mm    |
| Average                         |                       | 10.17mm     |          |
| Range                           |                       | 0-51mm      |          |
| BRAF status                     | Positive              | 24          | (42)     |
|                                 | Negative              | 33          | (58)     |
| Ulceration                      | Yes                   | 33          | (49)     |
|                                 | No                    | 34          | (51)     |
| Tumour infiltrating lymphocytes | Absent                | 14          | (24)     |
|                                 | Non-brisk             | 36          | (63)     |
|                                 | Brisk                 | 3           | (5)      |
|                                 | Variable              | 2           | (4)      |
|                                 | Unknown               | 2           | (4)      |

Random primary melanoma tumours which had undergone routine testing were selected for analysis by immunohistochemistry. Above is the cohort descriptives characterizing both the patient and the melanoma.

**Table 2 Pathological features of the tumours selected for gene expression**

| <b>Patient Characteristics</b>  |                       |             |          |
|---------------------------------|-----------------------|-------------|----------|
| <b>Characteristic</b>           |                       | <b>No.</b>  | <b>%</b> |
| Sex                             | Male                  | 13          | (65)     |
|                                 | Female                | 7           | (35)     |
| Age                             | Median                | 70.5 years  |          |
|                                 | Range                 | 26-85 years |          |
| Subtype                         | Superficial spreading | 5           | (25)     |
|                                 | Nodular               | 11          | (55)     |
|                                 | Acral lentiginous     | 2           | (10)     |
|                                 | Unknown               | 2           | (10)     |
| Primary location                | Acral                 | 4           | (20)     |
|                                 | Head and neck         | 3           | (15)     |
|                                 | Lower limb            | 5           | (25)     |
|                                 | Upper limb            | 5           | (25)     |
|                                 | Trunk                 | 3           | (15)     |
| Breslow depth                   | <1mm                  | 0           | (0)      |
|                                 | 1.01-2mm              | 1           | (5)      |
|                                 | 2.01-4mm              | 2           | (10)     |
|                                 | >4.01mm               | 17          | (85)     |
| Stage                           | pT2a                  | 1           | (5)      |
|                                 | pT3a                  | 3           | (15)     |
|                                 | pT4b                  | 16          | (80)     |
| Mitotic count                   | Median                | 12mm        |          |
|                                 | Average               | 11.89mm     |          |
|                                 | Range                 | 0-30mm      |          |
| BRAF status                     | Positive              | 6           | (30)     |
|                                 | Negative              | 14          | (70)     |
| Ulceration                      | Yes                   | 15          | (75)     |
|                                 | No                    | 5           | (25)     |
| Tumour infiltrating lymphocytes | Absent                | 3           | (15)     |
|                                 | Non-brisk             | 13          | (65)     |
|                                 | Brisk                 | 3           | (15)     |
|                                 | Unknown               | 1           | (5)      |

Random primary melanoma tumours which had undergone routine testing were selected for analysis by immunohistochemistry. 24 of these tumours were selected for gene expression analysis based on tumour tissue availability within the FFPE block. 4 failed internal quality control and were omitted from analysis. Above is the cohort descriptives characterizing both the patient and the melanoma of tumours which were successfully analysed for gene expression and presented in chapter 3.

**Table 3 Association of pathological tumour features with CD68<sup>+</sup> and CD163<sup>+</sup> macrophage infiltration**

|                     | CD68         |               | CD163          |                       |
|---------------------|--------------|---------------|----------------|-----------------------|
|                     | Peritumoural | Intratumoural | Peritumoural   | Intratumoural         |
| Age                 | 0.4          | 0.19          | 0.233 (0.162)  | 0.502 (0.092)         |
| Gender              | 0.425        | 0.834         | 0.498          | 0.78                  |
| Breslow depth       | <b>0.004</b> | 0.5           | 0.937 (0.011)  | <b>0.0191 (0.315)</b> |
| Stage               | 0.28         | 0.72          | 0.62           | 0.213                 |
| BRAF status         | <b>0.027</b> | <b>0.001</b>  | 0.443          | 0.726                 |
| Mitotic count (mm)  | <b>0.01</b>  | 0.13          | 0.908 (-0.017) | 0.501 (-0.017)        |
| Ulceration (mm)     | 0.12         | 0.36          | 0.074 (0.356)  | 0.208 (0.255)         |
| Ulceration (Yes/No) | <b>0.01</b>  | 0.224         | 0.549          | 0.683                 |
| TIL distribution    | 0.683        | 0.455         | 0.166          | 0.353                 |

The association of the number of CD68<sup>+</sup> and CD163<sup>+</sup> cells with patient and tumour characteristics was determined using Wilcoxon Rank Sum test and Spearman Correlations. The significance value for each relationship is shown above, and where relevant the correlation coefficient is also shown. Data is presented as significance values (correlation coefficients), n=57. With significant correlations in bold text.

**Table 4 Association of pathological tumour features with iNOS<sup>+</sup> and Arginase<sup>+</sup> cell density, presented as significance values**

|                     | Arginase       |               | iNOS          |               |
|---------------------|----------------|---------------|---------------|---------------|
|                     | Peritumoural   | Intratumoural | Peritumoural  | Intratumoural |
| Age                 | 0.242          | 0.861         | 0.28          | 0.17          |
| Gender              | 0.921          | 0.721         | 0.62          | 0.69          |
| Breslow depth       | 0.947          | 0.671         | 0.4           | 0.2           |
| Stage               | 0.894          | 0.482         | 0.09          | 0.16          |
| BRAF status         | 0.416          | 0.693         | <b>0.0002</b> | <b>0.0002</b> |
| Mitotic count (mm)  | 0.492          | 0.084         | 0.28          | 0.35          |
| Ulceration (mm)     | <b>0.00015</b> | 0.416         | 0.15          | 0.67          |
| Ulceration (Yes/No) | 0.795          | 0.33          | <b>0.008</b>  | <b>0.005</b>  |
| TIL distribution    | 0.278          | 0.582         | 0.96          | 0.77          |

The association of the number of arginase<sup>+</sup> and iNOS<sup>+</sup> cells with patient and tumour characteristics was determined using Wilcoxon Rank Sum test and Spearman Correlations. Data is presented as significance values, n=57. With significant correlations in bold text.
